# Supplementary material
Source: Research Square preprint supplement (doi:10.21203/rs.3.rs-9757503/v1)
Supplement: Supplementary file 1 [file 09ba4a6964549d2817a69bf2.docx]

| Table S2. Summary of anti-target drug information | | | | | | | | | | | | |
| --- | --- | --- | --- | --- | --- | --- | --- | --- | --- | --- | --- | --- |
| Gene_Symbol | Entrez_Gene_Id | Chromosome | Start_position | End_Position | Num_Drug | Drug_Resistance | Num_Cancer | Cancer | Sample | Variant_Classification | Reference | Other |
| ABCG2 | 9429 | 4 | 89020503 | 89020503 | 19 | taxanes, topoisomerase inhibitors, imatinib, erlotinib, sunitinib, nilotinib, mitoxantrone, doxorubicin | 7 | breast cancer, leukaemia, acute myelocytic leukemia, endometrial cancer, esophageal cancer, colon cancer, etc. | a1 | Missense_Mutation | PUBMED:11902585; PUBMED:9850061; PUBMED:2564696 | — |
| LRP1B | 53353 | 2 | 141128779 | 141128779 | 1 | liposomal doxorubicin | 1 | ovarian cancer | a2 | Missense_Mutation | PUBMED:22896685 | — |
| TP53 | 7157 | 17 | 7577547 | 7577547 | 4 | etoposide, nitrogen mustard, cisplatin | 1 | lymphoma | a6 | Missense_Mutation | PUBMED:19676044; PUBMED:7954404 | — |
| LRP1B | 53353 | 2 | 142567910 | 142567910 | 1 | liposomal doxorubicin | 1 | ovarian cancer | a1 | Missense_Mutation | PUBMED:22896685 | — |
| PDGFRA | 5156 | 4 | 55139771 | 55139771 | 2 | imatinib, sunitinib | 3 | chronic myelocytic leukemia, acute lymphoblastic leukemia, gastrointestinal stromal tumor | a2 | Missense_Mutation | PUBMED:18923524; PUBMED:25735500 | c.2525A>T |
| ESR1 | 2099 | 6 | 152129484 | 152129484 | 1 | endocrine therapy | 1 | breast cancer | a2 | Missense_Mutation | PUBMED:24185512 | c.1613A>G; c.1610A>C; c.1609T>A; c.1610A>G; c.1607_1608TC>AG |
| BRCA2 | 675 | 13 | 32972884 | 32972884 | 1 | platinum‑based chemotherapeutic drug | 2 | breast cancer, ovarian cancer | a1 | Missense_Mutation | PUBMED:18264088 | — |
