# Supplementary material
Source: Research Square preprint supplement (doi:10.21203/rs.3.rs-9757503/v1)
Supplement: Supplementary file 2 [file 55eaddc049d1a32fa74999ae.docx]

## Supplementary Materials

Targeted drugs associated with mutated genes and drug resistance-related mutations were screened from our database (**Table S1** and **Table S2**).

**Table S1** summarizes targeted drugs predicted for mutated genes identified in colorectal adenosquamous carcinoma, while **Table S2** lists drug resistance mutations and related chemotherapeutic agents.

The targeted drugs analyzed in this study are summarized in **Table S1** and **Table S2**. For example, clobazam may offer therapeutic benefits for ASC patients harboring GABRP mutations. Mutations at the ABCG2 site can lead to resistance to topoisomerase inhibitors, which helps avoid ineffective clinical treatments.
