# Supplementary material
Source: Research Square preprint supplement (doi:10.21203/rs.3.rs-9757503/v1)
Supplement: Supplementary file 3 [file 9034cd41950986b19dcc6af6.docx]

| Table S1.target drugs | | | | | | |
| --- | --- | --- | --- | --- | --- | --- |
| Gene | Drug | PG_FDA | DrugBank | PharmGKB | MyCancerGenome | Sources |
| GABRP | clobazam | - | Y | - | - | 1 |
| ROS1 | anti-egfr antibodies | - | - | - | Y | 1 |
| IFNL3 | peginterferon alfa-2b | Y | - | - | - | 1 |
| VTN | abciximab | - | Y | - | - | 1 |
| ADRA1A | phentolamine | - | Y | - | - | 1 |
| FCGR3A | gemtuzumab ozogamicin | - | Y | - | - | 1 |
| BCHE | tacrine | - | Y | - | - | 1 |
